# Supplementary material for: The GIST of it all: management of gastrointestinal stromal tumors (GIST) from the first steps to tailored therapy. A bibliometric analysis
Source: Springer Nature journal article supplement (doi:10.1007/s00423-024-03271-6), 2024-03-14
Supplement: MOESM1 [file 26858538]

# Supplementary Figure 1 Musa *et al.* 2023

1984-2000

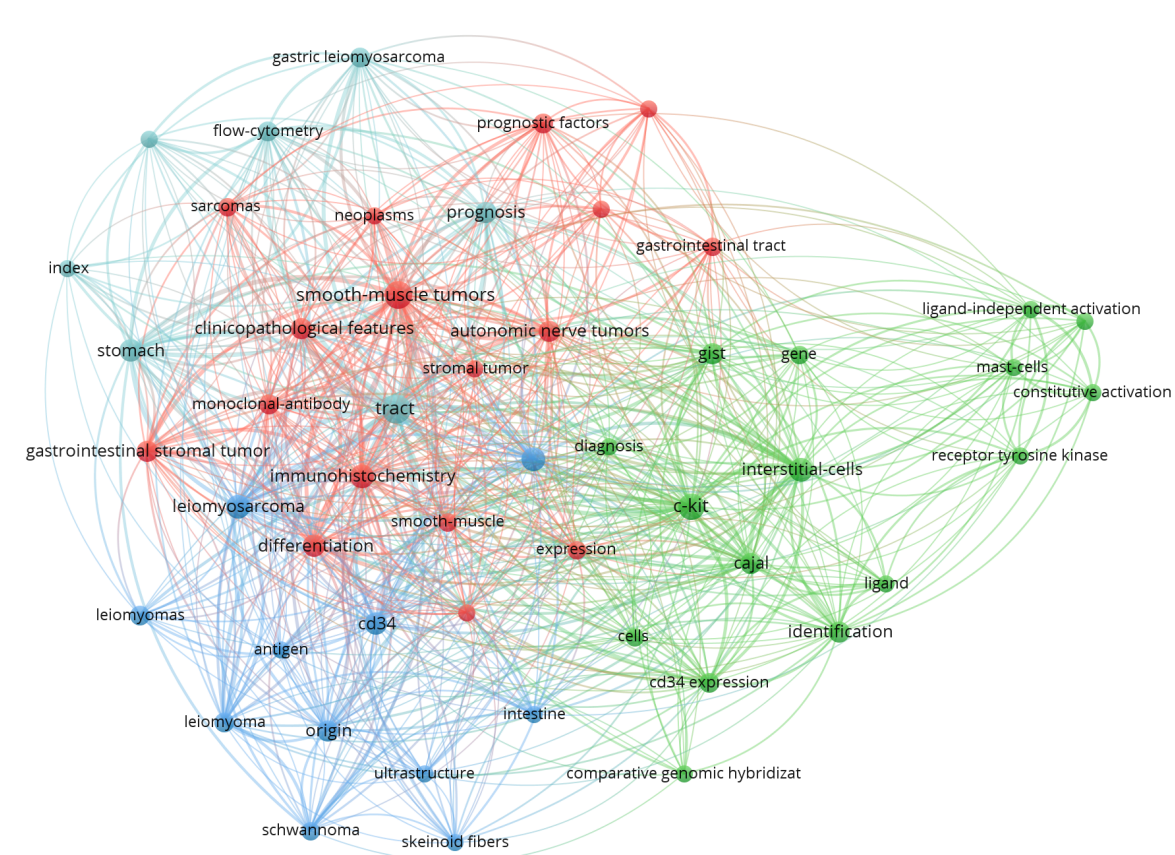

2001-2010

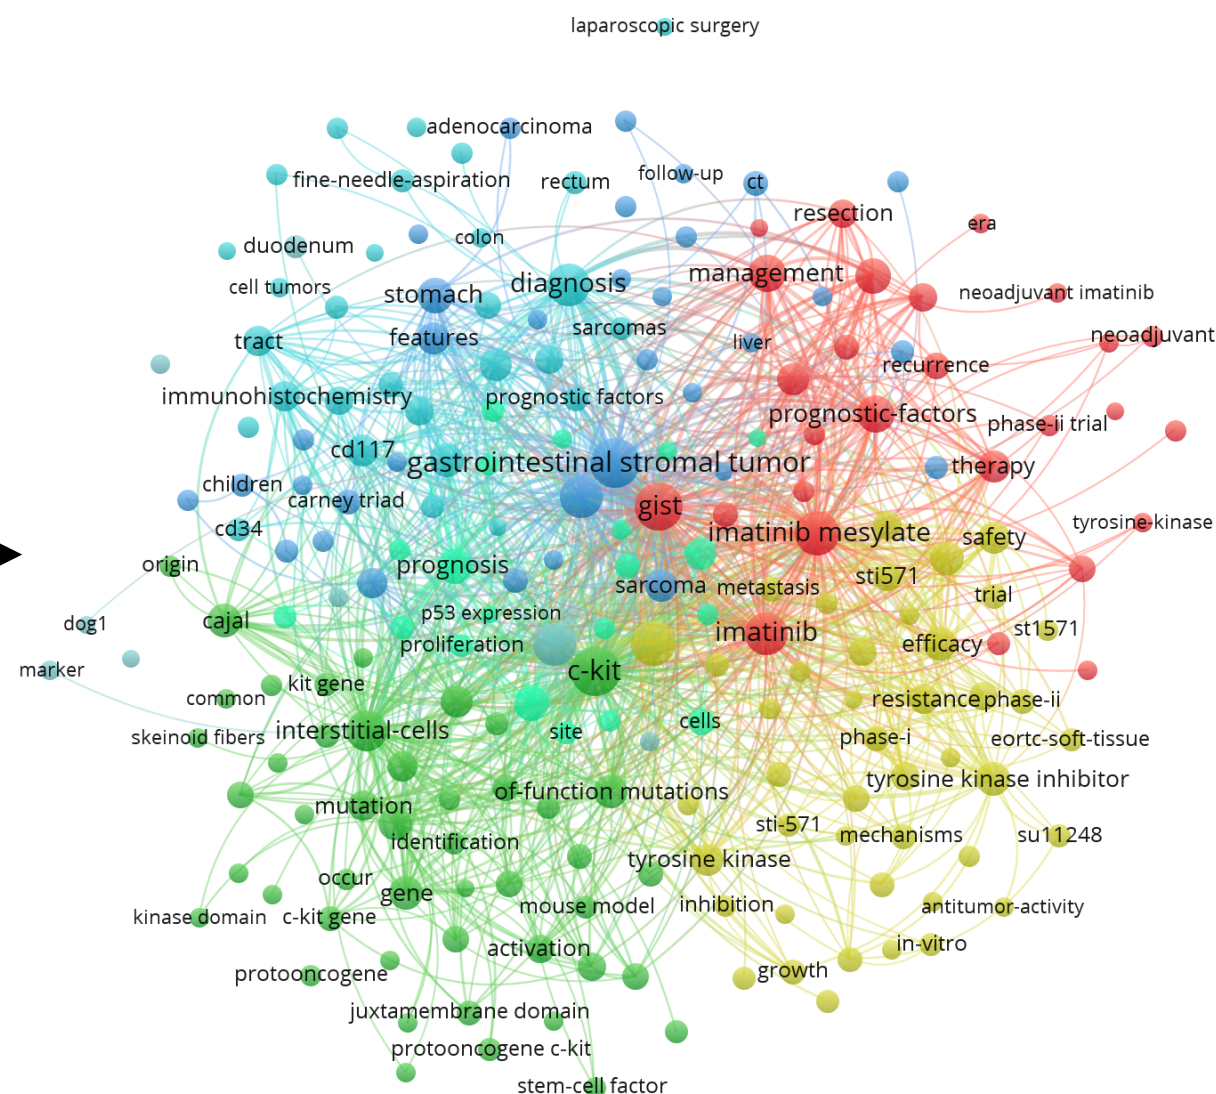

2011-2016

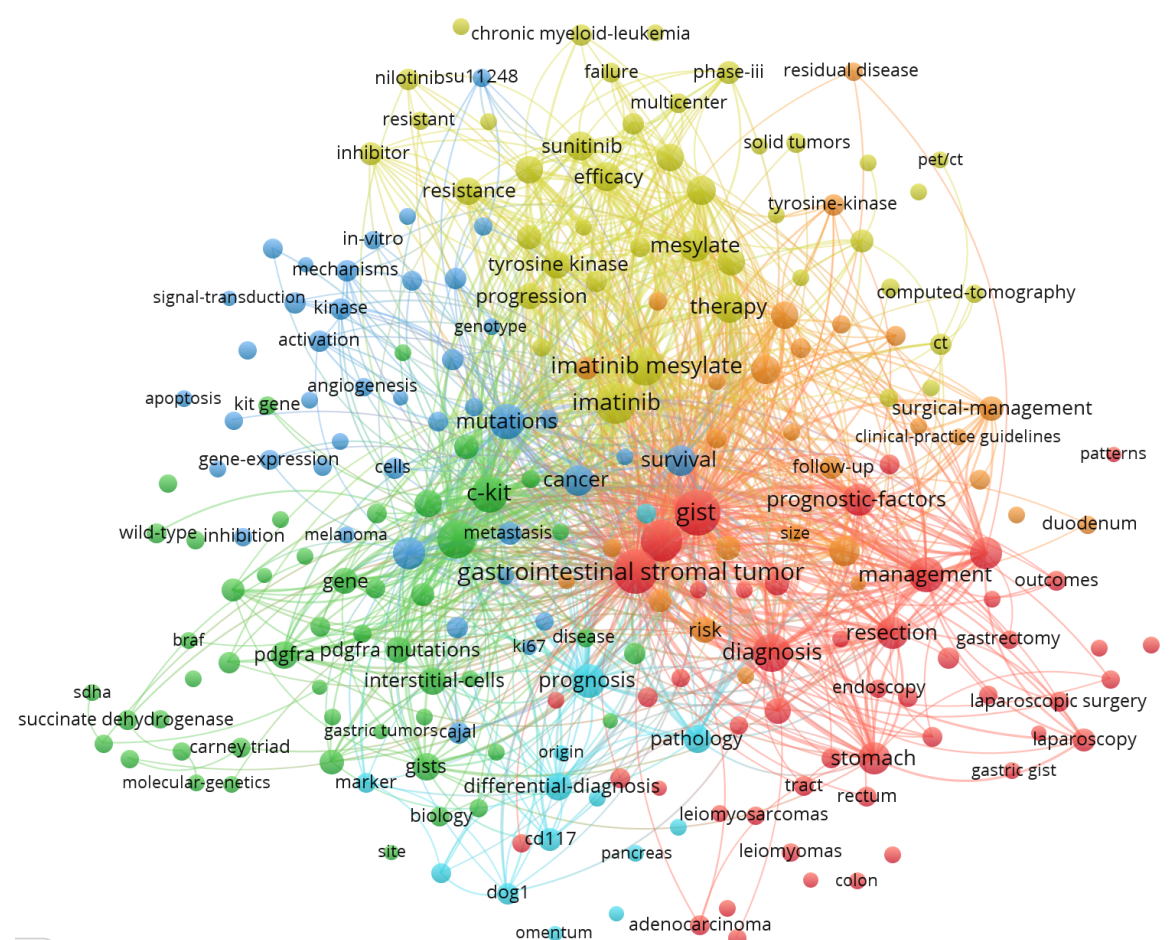

2017-2022

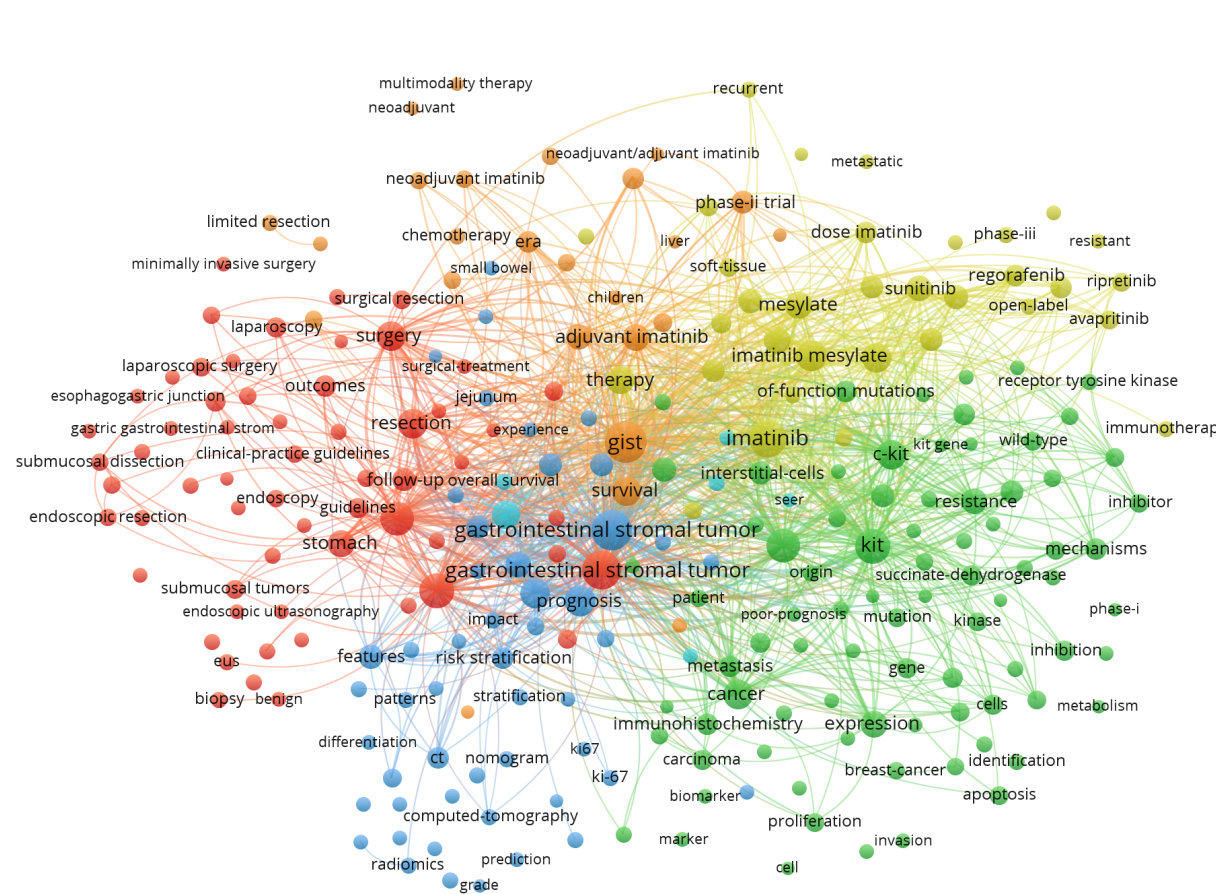

● **Cluster 1: Surgical management**  
● **Cluster 2: TKI**

● **Cluster 3: Diagnostic workup**  
● **Cluster 4: Pathophysiology**
